# Supplementary material for: Interrelationships between education, occupational class and income as determinants of sickness absence among young employees in 2002–2007 and 2008–2013
Source: PubMed Central journal article supplement (PMC4393569; doi:10.1186/s12889-015-1718-1), 2015-04-08
Supplement: 12889_2015_1718_MOESM1_ESM.pdf [file 12889_2015_1718_MOESM1_ESM.pdf]

**Table 4: Rate ratio of sickness absence days per 100 person years by socioeconomic indicators from different regression models, women \***

|                           |                            | Gross effect      | Occupation +<br>education | Occupation +<br>income | Education +<br>income | Occupation +<br>Education +<br>Income |
|---------------------------|----------------------------|-------------------|---------------------------|------------------------|-----------------------|---------------------------------------|
| 2002–2007                 |                            |                   |                           |                        |                       |                                       |
| <b>Education</b>          | Higher                     | 1                 | 1                         |                        | 1                     | 1                                     |
|                           | Upper secondary            | 1.86 (1.70, 2.03) | 1.40 (1.26, 1.56)         |                        | 1.70 (1.55, 1.86)     | 1.37 (1.23, 1.53)                     |
|                           | Lower secondary            | 2.42 (2.22, 2.64) | 1.90 (1.70, 2.13)         |                        | 1.98 (1.80, 2.18)     | 1.74 (1.56, 1.95)                     |
|                           | Basic                      | 3.56 (3.19, 3.96) | 2.84 (2.49, 3.24)         |                        | 2.81 (2.49, 3.16)     | 2.53 (2.22, 2.89)                     |
| <b>Occupational class</b> | Managers and professionals | 1                 | 1                         | 1                      |                       | 1                                     |
|                           | Semi-professionals         | 1.84 (1.70, 1.99) | 1.53 (1.40, 1.69)         | 1.66 (1.53, 1.80)      |                       | 1.44 (1.30, 1.58)                     |
|                           | Routine non-manuals        | 2.15 (1.99, 2.32) | 1.43 (1.30, 1.57)         | 1.55 (1.42, 1.70)      |                       | 1.19 (1.08, 1.32)                     |
|                           | Manual workers             | 2.10 (1.92, 2.31) | 1.27 (1.13, 1.42)         | 1.39 (1.25, 1.55)      |                       | 1.01 (0.89, 1.14)                     |
| <b>Individual income</b>  | Highest                    | 1                 |                           | 1                      | 1                     | 1                                     |
|                           | Second quartile            | 1.37 (1.30, 1.44) |                           | 1.23 (1.16, 1.30)      | 1.18 (1.12, 1.25)     | 1.17 (1.11, 1.24)                     |
|                           | Third quartile             | 1.60 (1.52, 1.69) |                           | 1.45 (1.35, 1.55)      | 1.27 (1.19, 1.35)     | 1.30 (1.21, 1.40)                     |
|                           | Lowest                     | 1.82 (1.72, 1.93) |                           | 1.68 (1.56, 1.81)      | 1.36 (1.27, 1.46)     | 1.45 (1.34, 1.57)                     |
| 2008–2013                 |                            |                   |                           |                        |                       |                                       |
| <b>Education</b>          | Higher                     | 1                 | 1                         |                        | 1                     | 1                                     |
|                           | Upper secondary            | 1.55 (1.44, 1.66) | 1.23 (1.13, 1.34)         |                        | 1.39 (1.29, 1.50)     | 1.21 (1.11, 1.32)                     |
|                           | Lower secondary            | 2.26 (2.10, 2.42) | 1.73 (1.58, 1.89)         |                        | 1.78 (1.63, 1.93)     | 1.60 (1.46, 1.76)                     |
|                           | Basic                      | 2.74 (2.48, 3.02) | 2.13 (1.90, 2.40)         |                        | 2.09 (1.87, 2.33)     | 1.93 (1.72, 2.17)                     |
| <b>Occupational class</b> | Managers and professionals | 1                 | 1                         | 1                      |                       | 1                                     |
|                           | Semi-professionals         | 1.66 (1.54, 1.78) | 1.44 (1.33, 1.57)         | 1.46 (1.35, 1.58)      |                       | 1.32 (1.21, 1.45)                     |
|                           | Routine non-manuals        | 2.20 (2.05, 2.35) | 1.52 (1.40, 1.66)         | 1.54 (1.41, 1.69)      |                       | 1.24 (1.13, 1.38)                     |
|                           | Manual workers             | 1.99 (1.82, 2.18) | 1.31 (1.17, 1.46)         | 1.29 (1.15, 1.44)      |                       | 1.01 (0.90, 1.14)                     |
| <b>Individual income</b>  | Highest                    | 1                 |                           | 1                      | 1                     | 1                                     |
|                           | Second quartile            | 1.40 (1.33, 1.47) |                           | 1.21 (1.14, 1.28)      | 1.23 (1.16, 1.29)     | 1.16 (1.10, 1.23)                     |
|                           | Third quartile             | 1.74 (1.66, 1.84) |                           | 1.45 (1.35, 1.56)      | 1.34 (1.26, 1.43)     | 1.30 (1.20, 1.39)                     |
|                           | Lowest                     | 1.96 (1.85, 2.07) |                           | 1.66 (1.54, 1.80)      | 1.45 (1.35, 1.55)     | 1.44 (1.33, 1.57)                     |

\* Only full-time employees, adjusted for age and measurement year
