# Supplementary material for: Interrelationships between education, occupational class and income as determinants of sickness absence among young employees in 2002–2007 and 2008–2013
Source: PubMed Central journal article supplement (PMC4393569; doi:10.1186/s12889-015-1718-1), 2015-04-08
Supplement: 12889_2015_1718_MOESM2_ESM.pdf [file 12889_2015_1718_MOESM2_ESM.pdf]

**Table 5: Rate ratio of sickness absence days by socioeconomic indicators from different regression models, men \***

|                           |                            | Gross effect      | Occupation +<br>education | Occupation +<br>income | Education +<br>income | Occupation +<br>Education +<br>Income |
|---------------------------|----------------------------|-------------------|---------------------------|------------------------|-----------------------|---------------------------------------|
| 2002–2007                 |                            |                   |                           |                        |                       |                                       |
| <b>Education</b>          | Higher                     | 1                 | 1                         |                        | 1                     | 1                                     |
|                           | Upper secondary            | 1.73 (1.42, 2.10) | 1.34 (1.07, 1.67)         |                        | 1.45 (1.19, 1.77)     | 1.31 (1.05, 1.64)                     |
|                           | Lower secondary            | 2.43 (2.02, 2.91) | 1.67 (1.34, 2.08)         |                        | 1.76 (1.45, 2.15)     | 1.57 (1.26, 1.95)                     |
|                           | Basic                      | 3.62 (2.97, 4.42) | 2.43 (1.92, 3.09)         |                        | 2.52 (2.03, 3.13)     | 2.25 (1.77, 2.85)                     |
| <b>Occupational class</b> | Managers and professionals | 1                 | 1                         | 1                      |                       | 1                                     |
|                           | Semi-professionals         | 1.47 (1.26, 1.72) | 1.24 (1.04, 1.48)         | 1.31 (1.11, 1.54)      |                       | 1.14 (0.95, 1.37)                     |
|                           | Routine non-manuals        | 2.21 (1.90, 2.56) | 1.69 (1.42, 2.01)         | 1.65 (1.38, 1.98)      |                       | 1.38 (1.14, 1.68)                     |
|                           | Manual workers             | 2.35 (2.04, 2.71) | 1.65 (1.38, 1.96)         | 1.62 (1.35, 1.94)      |                       | 1.28 (1.05, 1.56)                     |
| <b>Individual income</b>  | Highest                    | 1                 |                           | 1                      | 1                     | 1                                     |
|                           | Second quartile            | 1.66 (1.50, 1.85) |                           | 1.35 (1.19, 1.53)      | 1.44 (1.28, 1.60)     | 1.29 (1.14, 1.47)                     |
|                           | Third quartile             | 1.89 (1.69, 2.12) |                           | 1.46 (1.27, 1.69)      | 1.52 (1.34, 1.72)     | 1.34 (1.16, 1.55)                     |
|                           | Lowest                     | 2.20 (1.96, 2.47) |                           | 1.69 (1.44, 1.97)      | 1.68 (1.47, 1.92)     | 1.51 (1.28, 1.77)                     |
| 2008–2013                 |                            |                   |                           |                        |                       |                                       |
| <b>Education</b>          | Higher                     | 1                 | 1                         |                        | 1                     | 1                                     |
|                           | Upper secondary            | 1.57 (1.34, 1.83) | 1.11 (0.94, 1.32)         |                        | 1.25 (1.06, 1.46)     | 1.07 (0.90, 1.27)                     |
|                           | Lower secondary            | 2.28 (1.97, 2.63) | 1.44 (1.21, 1.71)         |                        | 1.49 (1.27, 1.75)     | 1.28 (1.08, 1.53)                     |
|                           | Basic                      | 3.38 (2.85, 4.01) | 2.10 (1.72, 2.56)         |                        | 2.14 (1.77, 2.57)     | 1.83 (1.50, 2.24)                     |
| <b>Occupational class</b> | Managers and professionals | 1                 | 1                         | 1                      |                       | 1                                     |
|                           | Semi-professionals         | 1.80 (1.58, 2.06) | 1.63 (1.40, 1.89)         | 1.45 (1.26, 1.67)      |                       | 1.38 (1.18, 1.60)                     |
|                           | Routine non-manuals        | 2.76 (2.42, 3.14) | 2.23 (1.92, 2.60)         | 1.79 (1.53, 2.09)      |                       | 1.60 (1.35, 1.89)                     |
|                           | Manual workers             | 2.45 (2.15, 2.77) | 1.86 (1.60, 2.17)         | 1.47 (1.25, 1.73)      |                       | 1.29 (1.08, 1.53)                     |
| <b>Individual income</b>  | Highest                    | 1                 |                           | 1                      | 1                     | 1                                     |
|                           | Second quartile            | 1.92 (1.74, 2.12) |                           | 1.55 (1.38, 1.74)      | 1.70 (1.53, 1.89)     | 1.50 (1.33, 1.68)                     |
|                           | Third quartile             | 2.44 (2.20, 2.71) |                           | 1.92 (1.69, 2.19)      | 2.03 (1.81, 2.28)     | 1.79 (1.57, 2.04)                     |
|                           | Lowest                     | 2.29 (2.06, 2.54) |                           | 1.90 (1.66, 2.19)      | 1.82 (1.62, 2.06)     | 1.72 (1.49, 1.98)                     |

\* Only full-time employees, adjusted for age and measurement year
